# Supplementary material for: Functional Cardiovascular Characterization of the Common Marmoset (Callithrix jacchus)
Source: MDPI journal article supplement (doi:10.3390/biology12081123), 2023-08-11
Supplement: s1 [file biology-2507293-SI.pdf › biology-2507293-SI.pdf]

## Supplemental Material

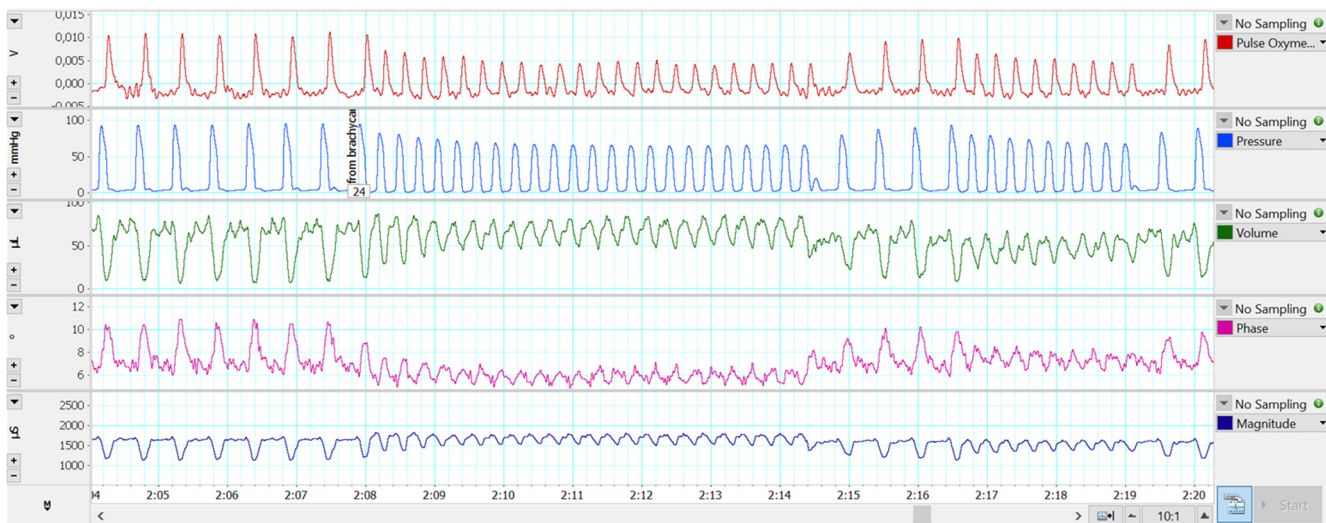

**Figure S1.** Representative tracings from LabChart Chart View of Animal 7 that was excluded due to arrhythmia.

|             | PV-loop  | Echocardiography | MRI        |
|-------------|----------|------------------|------------|
| HR (bpm)    | 202 ± 17 | 257 ± 17         | 230 ± 22   |
| ESV (μl)    | 99 ± 23  | 87 ± 20          | 368 ± 21*  |
| EDV (μl)    | 325 ± 31 | 272 ± 30         | 1000 ± 62* |
| SV (μl)     | 225 ± 31 | 185 ± 11         | 631 ± 53*  |
| EF(%)       | 70 ± 7   | 69 ± 3           | 63 ± 2     |
| CO (ml/min) | 45 ± 7   | 47 ± 2           | 150 ± 23*  |

**Table S1.** Functional hemodynamic data acquired via PV-loop, Echocardiography and MRI of the same 5 animals.

HR = Heart Rate, ESV = End Systolic Volume, EDV = End Diastolic Volume, SV = Stroke Volume, EF = Ejection Fraction, CO = Cardiac Output

=MRI data significantly different to PV-loop and Echocardiography ( $p < 0.05$ ) Data shown as mean ± SEM (n=5)

|                 | Advantages                                                                                                                                                                                                                                                                                                                                                                                                                                                                                                                                                                                                                                                                                                                                                                                                                                                                                                                                                                                                                                                                                                                                                                                                                                                                                                                                                                                          | Disadvantages                                                                                                                                                                                                                                                                                                                                                                                                                                                                                                                                                                                                                                                                                                                                                                                                                         |
|-----------------|-----------------------------------------------------------------------------------------------------------------------------------------------------------------------------------------------------------------------------------------------------------------------------------------------------------------------------------------------------------------------------------------------------------------------------------------------------------------------------------------------------------------------------------------------------------------------------------------------------------------------------------------------------------------------------------------------------------------------------------------------------------------------------------------------------------------------------------------------------------------------------------------------------------------------------------------------------------------------------------------------------------------------------------------------------------------------------------------------------------------------------------------------------------------------------------------------------------------------------------------------------------------------------------------------------------------------------------------------------------------------------------------------------|---------------------------------------------------------------------------------------------------------------------------------------------------------------------------------------------------------------------------------------------------------------------------------------------------------------------------------------------------------------------------------------------------------------------------------------------------------------------------------------------------------------------------------------------------------------------------------------------------------------------------------------------------------------------------------------------------------------------------------------------------------------------------------------------------------------------------------------|
| <b>Marmoset</b> | <ul style="list-style-type: none"> <li>- close phylogenetic relationship to humans [62, 63]</li> <li>- relatively rapid reproduction with twin birth [7, 31, 64, 65]; twins exhibit bone marrow chimerism [7, 31, 66-68]</li> <li>- commonly used for various biomedical research fields [7, 8, 69]</li> <li>- relatively easy to handle [7, 8]</li> <li>- least expensive NHP [31] with low zoonotic hazard [8, 31]</li> <li>- used for CV research since the 80s [45, 70-72]</li> <li>- similarities in heart anatomy and relative heart weight [19, 21]</li> <li>- heart size more suitable compared to rats for angiographic investigation [70]</li> <li>- spontaneous development of heart fibrosis, inflammatory cell infiltration and myocardial degeneration [41, 42]</li> <li>- similar age-related changes in microvasculature [73]</li> <li>- mean myocyte volume similar to man [40]</li> <li>- similar age-related changes in cardiovascular system [22, 43], immunology [17] as well as neurological and motor system [74-77] making it suitable for aging research [11, 15, 62, 63, 78]</li> <li>- spontaneous or induced models of obesity and diabetes [14]</li> <li>- similar lipoprotein profile [79-81]</li> <li>- good model to study renin-angiotensin system [82, 83]</li> <li>- possibility for transgenic applications [63, 84]</li> <li>- )similar ECG values(</li> </ul> | <ul style="list-style-type: none"> <li>- some aspects of the cardiovascular system have been studied (see Advantages), but heart function has never been comprehensively characterized</li> <li>- rhesus macaques closer resemble the human situation [85]</li> <li>- few researchers have experience with marmosets</li> <li>- lower availability than small rodents</li> <li>- relatively expensive/ complicated husbandry and breeding compared to rodents [38, 86]</li> <li>- longer life cycle than rodents</li> <li>- slight differences in cardiac anatomy [37] and myocyte structure [40] compared to human</li> <li>- ethical considerations [36]</li> <li>- heart rate differs from human</li> <li>- difficulties in genetic modification [38]</li> <li>- limited availability of cross-reacting antibodies [39]</li> </ul> |
| <b>Pig</b>      | <ul style="list-style-type: none"> <li>- highest analogy of heart and blood vessel sizes [87]</li> <li>- induced lesions more similar to human disease [88]</li> <li>- collateralization enables total infarct by occluding left anterior descending artery [87]</li> <li>- similarity in physiology, metabolism, genomics and proteomics to human [89, 90]</li> </ul>                                                                                                                                                                                                                                                                                                                                                                                                                                                                                                                                                                                                                                                                                                                                                                                                                                                                                                                                                                                                                              | <ul style="list-style-type: none"> <li>- high cost compared to rodents[38, 88]</li> <li>- difficult handling [88]</li> <li>- few genomic tools [88]</li> <li>- most antibodies for human are not effective in pigs [90]</li> </ul>                                                                                                                                                                                                                                                                                                                                                                                                                                                                                                                                                                                                    |

|              |                                                                                                                                                                                                                                                                                                                                                                                                                                                                                                                                                                                                                                                                                                                                                 |                                                                                                                                                                                                                                                                                                                                                                                                                                                                                                                                                                                                         |
|--------------|-------------------------------------------------------------------------------------------------------------------------------------------------------------------------------------------------------------------------------------------------------------------------------------------------------------------------------------------------------------------------------------------------------------------------------------------------------------------------------------------------------------------------------------------------------------------------------------------------------------------------------------------------------------------------------------------------------------------------------------------------|---------------------------------------------------------------------------------------------------------------------------------------------------------------------------------------------------------------------------------------------------------------------------------------------------------------------------------------------------------------------------------------------------------------------------------------------------------------------------------------------------------------------------------------------------------------------------------------------------------|
|              | <ul style="list-style-type: none"> <li>- availability of various heart disease models and genetically established cardiomyopathy [89]</li> <li>- valid for restenosis studies [88]</li> <li>- genetically modified established model for human atherosclerosis [38]</li> <li>- non-invasive techniques for heart catheterization [91]</li> <li>- availability of monitoring systems in chronic models [91]</li> <li>- availability of imaging-based study techniques [91]</li> </ul>                                                                                                                                                                                                                                                            |                                                                                                                                                                                                                                                                                                                                                                                                                                                                                                                                                                                                         |
| <b>Dog</b>   | <ul style="list-style-type: none"> <li>- docility and cognitive performance allow non-invasive and non-sedated assessments [92]</li> <li>- shared genetic evolution with humans [92, 93]</li> <li>- left ventricular function and volume similar to human [94]</li> <li>- myosin heavy chain distribution similar to human [94]</li> <li>- comparable electrophysiology [95]</li> <li>- cardiac proteome similar to human [90]</li> <li>- established disease models [96-98]</li> <li>- genetic modifications possible [92]</li> <li>- availability of monitoring systems in chronic models [91]</li> <li>- availability of imaging-based study techniques [91]</li> <li>- naturally occurring cardiomyopathies (summarized in [99])</li> </ul> | <ul style="list-style-type: none"> <li>- variation in coronary artery supply compared to humans as well as between individual dogs results in a complicated surgery setting for MI [87, 100, 101]</li> <li>- differences in heart anatomy [102]</li> <li>- relatively costly/ complicated housing and breeding [38, 90, 94]</li> <li>- most antibodies for human are not effective in dogs [90]</li> <li>- genetic modification not as easy as in small rodents [38, 103]</li> <li>- complicated operation [38]</li> <li>- ethical considerations due to companion animal status (in Europe)</li> </ul> |
| <b>Mouse</b> | <ul style="list-style-type: none"> <li>- large experience [38, 88]</li> <li>- well-known genome, relative ease of genome manipulation [88]</li> <li>- low cost [88, 94]</li> <li>- short reproductive cycle [38, 88, 91, 94] allows for studies over short time period</li> <li>- useful for noninvasive imaging [88]</li> <li>- rapid development of atherosclerotic plaques in transgenic mice under specific diet [88]</li> <li>- standardized feeding and housing conditions with low variability [38]</li> </ul>                                                                                                                                                                                                                           | <ul style="list-style-type: none"> <li>- only partial resemblance to humans [88]</li> <li>- heart rate differs significantly from humans [94, 104]</li> <li>- cardiac metabolism differs from human [105]</li> <li>- action potential differs to the human one [94]</li> <li>- different ratio of <math>\alpha</math>- and <math>\beta</math>-myosin heavy chains [94]</li> <li>- atherosclerosis does not occur spontaneously in mice [106], more atherosclerotic than atherothrombosis model [88]</li> <li>- very high level of blood lipids [88]</li> </ul>                                          |
| <b>Rat</b>   | <ul style="list-style-type: none"> <li>- easy to handle, available, low cost [88]</li> <li>- short reproductive cycle [91]</li> </ul>                                                                                                                                                                                                                                                                                                                                                                                                                                                                                                                                                                                                           | <ul style="list-style-type: none"> <li>- heart rate differs significantly from humans</li> <li>- do not develop atheroma [88]</li> </ul>                                                                                                                                                                                                                                                                                                                                                                                                                                                                |

|  |                                                                                                                                                                                                                                                                                                                                                                                                                                                                                                                                                             |                                                                                                                                                                                                                                                                         |
|--|-------------------------------------------------------------------------------------------------------------------------------------------------------------------------------------------------------------------------------------------------------------------------------------------------------------------------------------------------------------------------------------------------------------------------------------------------------------------------------------------------------------------------------------------------------------|-------------------------------------------------------------------------------------------------------------------------------------------------------------------------------------------------------------------------------------------------------------------------|
|  | <ul style="list-style-type: none"> <li>- established model of choice for decades in cardiovascular research [107]</li> <li>- useful for restenosis analysis [88]</li> </ul>                                                                                                                                                                                                                                                                                                                                                                                 | <ul style="list-style-type: none"> <li>- modification of hemodynamic conditions in open-thorax models [91]</li> </ul>                                                                                                                                                   |
|  | <b>Rabbit</b> <ul style="list-style-type: none"> <li>- established disease models [108, 109]</li> <li>- inexpensive, easily available [88, 110]</li> <li>- easy to handle, medium size [88]</li> <li>- short reproductive cycle [111]</li> <li>- mimics alteration of myocardial function observed in end stage failing human myocard [94]</li> <li>- development of fibroatheroma lesion in atherosclerosis model [88]</li> <li>- useful for restenosis models [88]</li> <li>- WHHLMI strain develops myocardial infarction spontaneously [109]</li> </ul> | <ul style="list-style-type: none"> <li>- heart rate differs from humans [104]</li> <li>- few genomic tools [88]</li> <li>- differences in cardiac metabolism [103]</li> <li>- need for high blood cholesterol levels for development of atherosclerosis [88]</li> </ul> |

**Table S2.** Selected advantages and disadvantages of different animal models relevant for cardiovascular research.

## References

- Fischer, K.E.; Austad, S.N. The development of small primate models for aging research. *ILAR J.* 2011, 52, 78–88. <https://doi.org/10.1093/ilar.52.1.78>.
- Mattison, J.A.; Vaughan, K.L. An overview of nonhuman primates in aging research. *Exp. Gerontol.* 2017, 94, 41–45. <https://doi.org/10.1016/j.exger.2016.12.005>.
- Abbott, D.H.; Hearn, J.P. Physical, hormonal and behavioural aspects of sexual development in the marmoset monkey, *Callithrix jacchus*. *J. Reprod. Fertil.* 1978, 53, 155–166. <https://doi.org/10.1530/jrf.0.0530155>.
- Tardif, S.D.; Smucny, D.A.; Abbott, D.H.; Mansfield, K.; Schultz-Darken, N.; Yamamoto, M.E. Reproduction in captive common marmosets (*Callithrix jacchus*). *Comp. Med.* 2003, 53, 364–368.
- Benirschke, K.; Anderson, J.M.; Brownhill, L.E. Marrow Chimerism in Marmosets. *Science* 1962, 138, 513–515. <https://doi.org/10.1126/science.138.3539.513>.
- Benirschke, K.; Brownhill, L.E. Further observations on marrow chimerism in marmosets. *Cytogenetics* 1962, 1, 245–257. <https://doi.org/10.1159/000129734>.
- Silva, M.O.M.; Armada, J.L.A.; Verona, C.E.S.; Heliodoro, G.; Nogueira, D.M. Cytogenetics and Molecular Genetic Analysis of Chimerism in Marmosets (*Callithrix*: Primates). *An. Acad. Bras. Cienc.* 2017, 89, 2793–2804. <https://doi.org/10.1590/0001-3765201720170484>.
- Greenough, T.C.; Carville, A.; Coderre, J.; Somasundaran, M.; Sullivan, J.L.; Luzuriaga, K.; Mansfield, K. Pneumonitis and multi-organ system disease in common marmosets (*Callithrix jacchus*) infected with the severe acute respiratory syndrome-associated coronavirus. *Am. J. Pathol.* 2005, 167, 455–463. [https://doi.org/10.1016/s0002-9440\(10\)62989-6](https://doi.org/10.1016/s0002-9440(10)62989-6).
- Charnock, J.S.; McLennan, P.L.; McIntosh, G.H.; Barnden, L.R.; Butfield, I.H. Radionuclide angiographic study of the influence of dietary lipid supplements on cardiac function in the marmoset (*Callithrix jacchus*). *Cardiovasc. Res.* 1987, 21, 369–376. <https://doi.org/10.1093/cvr/21.5.369>.
- McMurchie, E.J.; Patten, G.S.; McLennan, P.L.; Charnock, J.S.; Nestel, P.J. The influence of dietary lipid supplementation on cardiac beta-adrenergic receptor adenylate cyclase activity in the marmoset monkey. *Biochim. Biophys. Acta* 1988, 937, 347–358. [https://doi.org/10.1016/0005-2736\(88\)90257-x](https://doi.org/10.1016/0005-2736(88)90257-x).

72. McMurchie, E.J.; Patten, G.S.; McLennan, P.L.; Charnock, J.S. A comparison of the properties of the cardiac beta-adrenergic receptor adenylyl cyclase system in the rat and the marmoset monkey. *Comp. Biochem. Physiol. B* 1987, 88, 989–998. [https://doi.org/10.1016/0305-0491\(87\)90275-6](https://doi.org/10.1016/0305-0491(87)90275-6).
73. Sobin, S.S.; Bernick, S.; Ballard, K.W. Histochemical characterization of the aging microvasculature in the human and other mammalian and non-mammalian vertebrates by the periodic acid-Schiff reaction. *Mech. Ageing Dev.* 1992, 63, 183–192. [https://doi.org/10.1016/0047-6374\(92\)90064-k](https://doi.org/10.1016/0047-6374(92)90064-k).
74. Geula, C.; Nagykerly, N.; Wu, C.K. Amyloid-beta deposits in the cerebral cortex of the aged common marmoset (*Callithrix jacchus*): Incidence and chemical composition. *Acta Neuropathol.* 2002, 103, 48–58. <https://doi.org/10.1007/s004010100429>.
75. Berkovitz, B.K.; Pacy, J. Age changes in the cells of the intra-articular disc of the temporomandibular joints of rats and marmosets. *Arch. Oral Biol.* 2000, 45, 987–995. [https://doi.org/10.1016/s0003-9969\(00\)00067-4](https://doi.org/10.1016/s0003-9969(00)00067-4).
76. Harada, T.; Tokuriki, M.; Tanioka, Y. Age-related changes in the brainstem auditory evoked potentials of the marmoset. *Heart Res.* 1999, 128, 119–124. [https://doi.org/10.1016/s0378-5955\(98\)00201-9](https://doi.org/10.1016/s0378-5955(98)00201-9).
77. Black, A.; Lane, M.A. Nonhuman primate models of skeletal and reproductive aging. *Gerontology* 2002, 48, 72–80. <https://doi.org/10.1159/000048930>.
78. Ross, C.N.; Salmon, A.B. Aging research using the common marmoset: Focus on aging interventions. *Nutr. Healthy Aging* 2019, 5, 97–109. <https://doi.org/10.3233/nha-180046>.
79. Crook, D.; Weisgraber, K.H.; Boyles, J.K.; Mahley, R.W. Isolation and characterization of plasma lipoproteins of common marmoset monkey. Comparison of effects of control and atherogenic diets. *Arteriosclerosis* 1990, 10, 633–647. <https://doi.org/10.1161/01.atv.10.4.633>.
80. Abbey, M.; Clifton, P.M.; McMurchie, E.J.; McIntosh, G.H.; Nestel, P.J. Effect of a high fat/cholesterol diet with or without eicosapentaenoic acid on plasma lipids, lipoproteins and lipid transfer protein activity in the marmoset. *Atherosclerosis* 1990, 81, 163–174. [https://doi.org/10.1016/0021-9150\(90\)90063-o](https://doi.org/10.1016/0021-9150(90)90063-o).
81. Lima, V.L.; Sena, V.L.; Stewart, B.; Owen, J.S.; Dolphin, P.J. An evaluation of the marmoset *Callithrix jacchus* (sagüi) as an experimental model for the dyslipoproteinemia of human *Schistosomiasis mansoni*. *Biochim. Biophys. Acta* 1998, 1393, 235–243. [https://doi.org/10.1016/s0005-2760\(98\)00076-9](https://doi.org/10.1016/s0005-2760(98)00076-9).
82. Michel, J.B.; Wood, J.; Hofbauer, K.; Corvol, P.; Menard, J. Blood pressure effects of renin inhibition by human renin antiserum in normotensive marmosets. *Am. J. Physiol.* 1984, 246, F309–F316. <https://doi.org/10.1152/ajprenal.1984.246.3.F309>.
83. Hiruma, M.; Kim, S.; Ikemoto, F.; Murakami, K.; Yamamoto, K. Fate of recombinant human renin administered exogenously to anesthetized monkeys. *Hypertension* 1988, 12, 317–323. <https://doi.org/10.1161/01.hyp.12.3.317>.
84. Drummer, C.; Vogt, E.J.; Heistermann, M.; Roshani, B.; Becker, T.; Mätz-Rensing, K.; Kues, W.A.; Kügler, S.; Behr, R. Generation and Breeding of EGFP-Transgenic Marmoset Monkeys: Cell Chimerism and Implications for Disease Modeling. *Cells* 2021, 10, 505. <https://doi.org/10.3390/cells10030505>.
85. Preuss, T.M. Critique of Pure Marmoset. *Brain Behav. Evol.* 2019, 93, 92–107. <https://doi.org/10.1159/000500500>.
86. Holtze, S.; Gorshkova, E.; Braude, S.; Cellerino, A.; Dammann, P.; Hildebrandt, T.B.; Hoeflich, A.; Hoffmann, S.; Koch, P.; Terzibasi Tozzini, E.; et al. Alternative Animal Models of Aging Research. *Front. Mol. Biosci.* 2021, 8, 660959. <https://doi.org/10.3389/fmolb.2021.660959>.
87. Swindle, M.M.; Makin, A.; Herron, A.J.; Clubb, F.J., Jr.; Frazier, K.S. Swine as models in biomedical research and toxicology testing. *Vet. Pathol.* 2012, 49, 344–356. <https://doi.org/10.1177/0300985811402846>.
88. Zaragoza, C.; Gomez-Guerrero, C.; Martin-Ventura, J.L.; Blanco-Colio, L.; Lavin, B.; Mallavia, B.; Tarin, C.; Mas, S.; Ortiz, A.; Egido, J. Animal models of cardiovascular diseases. *J. Biomed. Biotechnol.* 2011, 2011, 497841. <https://doi.org/10.1155/2011/497841>.
89. Hiroaki, O.; Kozue, M.; Hidetoshi, M. Large Animal Models in Cardiovascular Research. In *Animal Models and Experimental Research in Medicine*; Mahmut, K., Volkan, G., Abdulsamed, K., Eds.; IntechOpen: Rijeka, Croatia, 2022; p. Ch. 11.
90. Kooij, V.; Venkatraman, V.; Tra, J.; Kirk, J.A.; Rowell, J.; Blice-Baum, A.; Cammarato, A.; Van Eyk, J.E. Sizing up models of heart failure: Proteomics from flies to humans. *Proteom. Clin. Appl.* 2014, 8, 653–664. <https://doi.org/10.1002/prca.201300123>.
91. Chorro, F.J.; Such-Belenguer, L.; López-Merino, V. Animal Models of Cardiovascular Disease. *Rev. Española Cardiol. (Engl. Ed.)* 2009, 62, 69–84. [https://doi.org/10.1016/S1885-5857\(09\)71516-6](https://doi.org/10.1016/S1885-5857(09)71516-6).

92. Barthélémy, I.; Hitte, C.; Tiret, L. The Dog Model in the Spotlight: Legacy of a Trustful Cooperation. *J. Neuromuscul. Dis.* 2019, 6, 421–451. <https://doi.org/10.3233/jnd-190394>.
93. Wang, G.D.; Zhai, W.; Yang, H.C.; Fan, R.X.; Cao, X.; Zhong, L.; Wang, L.; Liu, F.; Wu, H.; Cheng, L.G.; et al. The genomics of selection in dogs and the parallel evolution between dogs and humans. *Nat. Commun.* 2013, 4, 1860. <https://doi.org/10.1038/ncomms2814>.
94. Hasenfuss, G. Animal models of human cardiovascular disease, heart failure and hypertrophy. *Cardiovasc. Res.* 1998, 39, 60–76. [https://doi.org/10.1016/S0008-6363\(98\)00110-2](https://doi.org/10.1016/S0008-6363(98)00110-2).
95. Kaese, S.; Frommeyer, G.; Verheule, S.; van Loon, G.; Gehrman, J.; Breithardt, G.; Eckardt, L. The ECG in cardiovascular-relevant animal models of electrophysiology. *Herzschrittmacherther. Elektrophysiol.* 2013, 24, 84–91. <https://doi.org/10.1007/s00399-013-0260-z>.
96. Lavine, S.J. Effect of changes in contractility on the index of myocardial performance in the dysfunctional left ventricle. *Cardiovasc. Ultrasound* 2006, 4, 45. <https://doi.org/10.1186/1476-7120-4-45>.
97. Loen, V.; Vos, M.A.; van der Heyden, M.A.G. The canine chronic atrioventricular block model in cardiovascular preclinical drug research. *Br. J. Pharmacol.* 2022, 179, 859–881. <https://doi.org/10.1111/bph.15436>.
98. Powers, J.C.; Recchia, F. Canine Model of Pacing-Induced Heart Failure. *Methods Mol. Biol.* 2018, 1816, 309–325. [https://doi.org/10.1007/978-1-4939-8597-5\\_24](https://doi.org/10.1007/978-1-4939-8597-5_24).
99. Duncker, D.J.; Bakkers, J.; Brundel, B.J.; Robbins, J.; Tardiff, J.C.; Carrier, L. Animal and in silico models for the study of sarcomeric cardiomyopathies. *Cardiovasc. Res.* 2015, 105, 439–448. <https://doi.org/10.1093/cvr/cvv006>.
100. Lowe, J.E.; Reimer, K.A.; Jennings, R.B. Experimental infarct size as a function of the amount of myocardium at risk. *Am. J. Pathol.* 1978, 90, 363–379.
101. Khan, M.S.; Smego, D.; Ishidoya, Y.; Hirahara, A.M.; Offei, E.; Ruiz Castillo, M.S.; Gharbia, O.; Li, H.; Palatinus, J.A.; Krueger, L.; et al. A canine model of chronic ischemic heart failure. *Am. J. Physiol. Heart Circ. Physiol.* 2023, 324, H751–H761. <https://doi.org/10.1152/ajpheart.00647.2022>.
102. Chevènement, O.; Borenstein, N.; Kieval, R.; Fiette, L.; Aujard, F. Animal model considerations to evaluate prosthetic tricuspid valve implants. *Ann. Anat.* 2021, 234, 151625. <https://doi.org/10.1016/j.aanat.2020.151625>.
103. Milani-Nejad, N.; Janssen, P.M. Small and large animal models in cardiac contraction research: Advantages and disadvantages. *Pharmacol. Ther.* 2014, 141, 235–249. <https://doi.org/10.1016/j.pharmthera.2013.10.007>.
104. Hornyik, T.; Rieder, M.; Castiglione, A.; Major, P.; Bacsko, I.; Brunner, M.; Koren, G.; Odening, K.E. Transgenic rabbit models for cardiac disease research. *Br. J. Pharmacol.* 2022, 179, 938–957. <https://doi.org/10.1111/bph.15484>.
105. Ginis, I.; Luo, Y.; Miura, T.; Thies, S.; Brandenberger, R.; Gerecht-Nir, S.; Amit, M.; Hoke, A.; Carpenter, M.K.; Itskovitz-Eldor, J.; et al. Differences between human and mouse embryonic stem cells. *Dev. Biol.* 2004, 269, 360–380. <https://doi.org/10.1016/j.ydbio.2003.12.034>.
106. Emini Veseli, B.; Perrotta, P.; De Meyer, G.R.A.; Roth, L.; Van der Donckt, C.; Martinet, W.; De Meyer, G.R.Y. Animal models of atherosclerosis. *Eur. J. Pharmacol.* 2017, 816, 3–13. <https://doi.org/10.1016/j.ejphar.2017.05.010>.
107. Bader, M. Rat Models of Cardiovascular Diseases. In *Rat Genomics: Methods and Protocols*; Anegón, I., Ed.; Humana Press: Totowa, NJ, USA, 2010; pp. 403–414. [https://doi.org/10.1007/978-1-60327-389-3\\_27](https://doi.org/10.1007/978-1-60327-389-3_27).
108. González, G.E.; Seropian, I.M.; Krieger, M.L.; Palleiro, J.; Lopez Verrilli, M.A.; Gironacci, M.M.; Cavallero, S.; Wilensky, L.; Tomasi, V.H.; Gelpi, R.J.; et al. Effect of early versus late AT(1) receptor blockade with losartan on postmyocardial infarction ventricular remodeling in rabbits. *Am. J. Physiol. Heart Circ. Physiol.* 2009, 297, H375–H386. <https://doi.org/10.1152/ajpheart.00498.2007>.
109. Shiomi, M.; Ito, T.; Yamada, S.; Kawashima, S.; Fan, J. Development of an animal model for spontaneous myocardial infarction (WHHLMI rabbit). *Arterioscler. Thromb. Vasc. Biol.* 2003, 23, 1239–1244. <https://doi.org/10.1161/01.Atv.0000075947.28567.50>.
110. Chobanian, A.V.; Arquilla, E.R.; Clarkson, T.B.; Eder, H.A.; Howard, C.F., Jr.; Regan, T.J.; Williamson, J.R. Cardiovascular complications. *Diabetes* 1982, 31, 54–64. <https://doi.org/10.2337/diab.31.1.s54>.
111. Calasans-Maia, M.D.; Monteiro, M.L.; Ascoli, F.O.; Granjeiro, J.M. The rabbit as an animal model for experimental surgery. *Acta Cir. Bras.* 2009, 24, 325–328. <https://doi.org/10.1590/s0102-86502009000400014>.
